# Supplementary material for: Quantifying drug tissue biodistribution by integrating high content screening with deep-learning analysis
Source: PubMed Central journal article supplement (PMC7463244; doi:10.1038/s41598-020-71347-6), 2020-09-01

**Quantifying Drug Tissue Biodistribution**  
**by Integrating High Content Screening with Deep-Learning Analysis**

Zhuyin Li<sup>1\*</sup>, Youping Xiao<sup>2</sup>, Jia Peng<sup>1</sup>, Darren Locke<sup>3</sup>, Derek Holmes<sup>4</sup>, Lei Li<sup>1</sup>, Shannon Hamilton<sup>1</sup>, Erica Cook<sup>1</sup>, Larnie Myer<sup>1</sup>, Dana Vanderwall<sup>2</sup>, Normand Cloutier<sup>2</sup>, Akbar M. Siddiqui<sup>2</sup>, Paul Whitehead<sup>2</sup>, Richard Bishop<sup>2</sup>, Lei Zhao<sup>5</sup> and Mary Ellen Cvijic<sup>1</sup>

<sup>1</sup>Lead Discovery and Optimization, Bristol-Myers Squibb, Princeton, NJ. <sup>2</sup>Information Technology for R&D, Bristol-Myers Squibb, Princeton, NJ. <sup>3</sup>Translational Medicine, Bristol-Myers Squibb, Princeton, NJ. <sup>4</sup>Immunoscience Biology Discovery, Bristol-Myers Squibb, Princeton, NJ. <sup>5</sup>Cardiovascular Translational Research, Bristol-Myers Squibb, Hopewell, NJ.

\*Corresponding Author:

Zhuyin Li

Bristol-Myers Squibb

3551 Lawrenceville Road, Princeton, NJ 08540

Phone: 609-252-7681

[Zhuyin.Li@bms.com](mailto:Zhuyin.Li@bms.com)

<sup>1</sup>These two authors contributed equally.

**Figure S1.** Full color original image of colon proximal section acquired by HCS, red:  $\alpha$ CDH-A647; green anti-EpCAM; blue: DAPI. 24 hours after treatment.

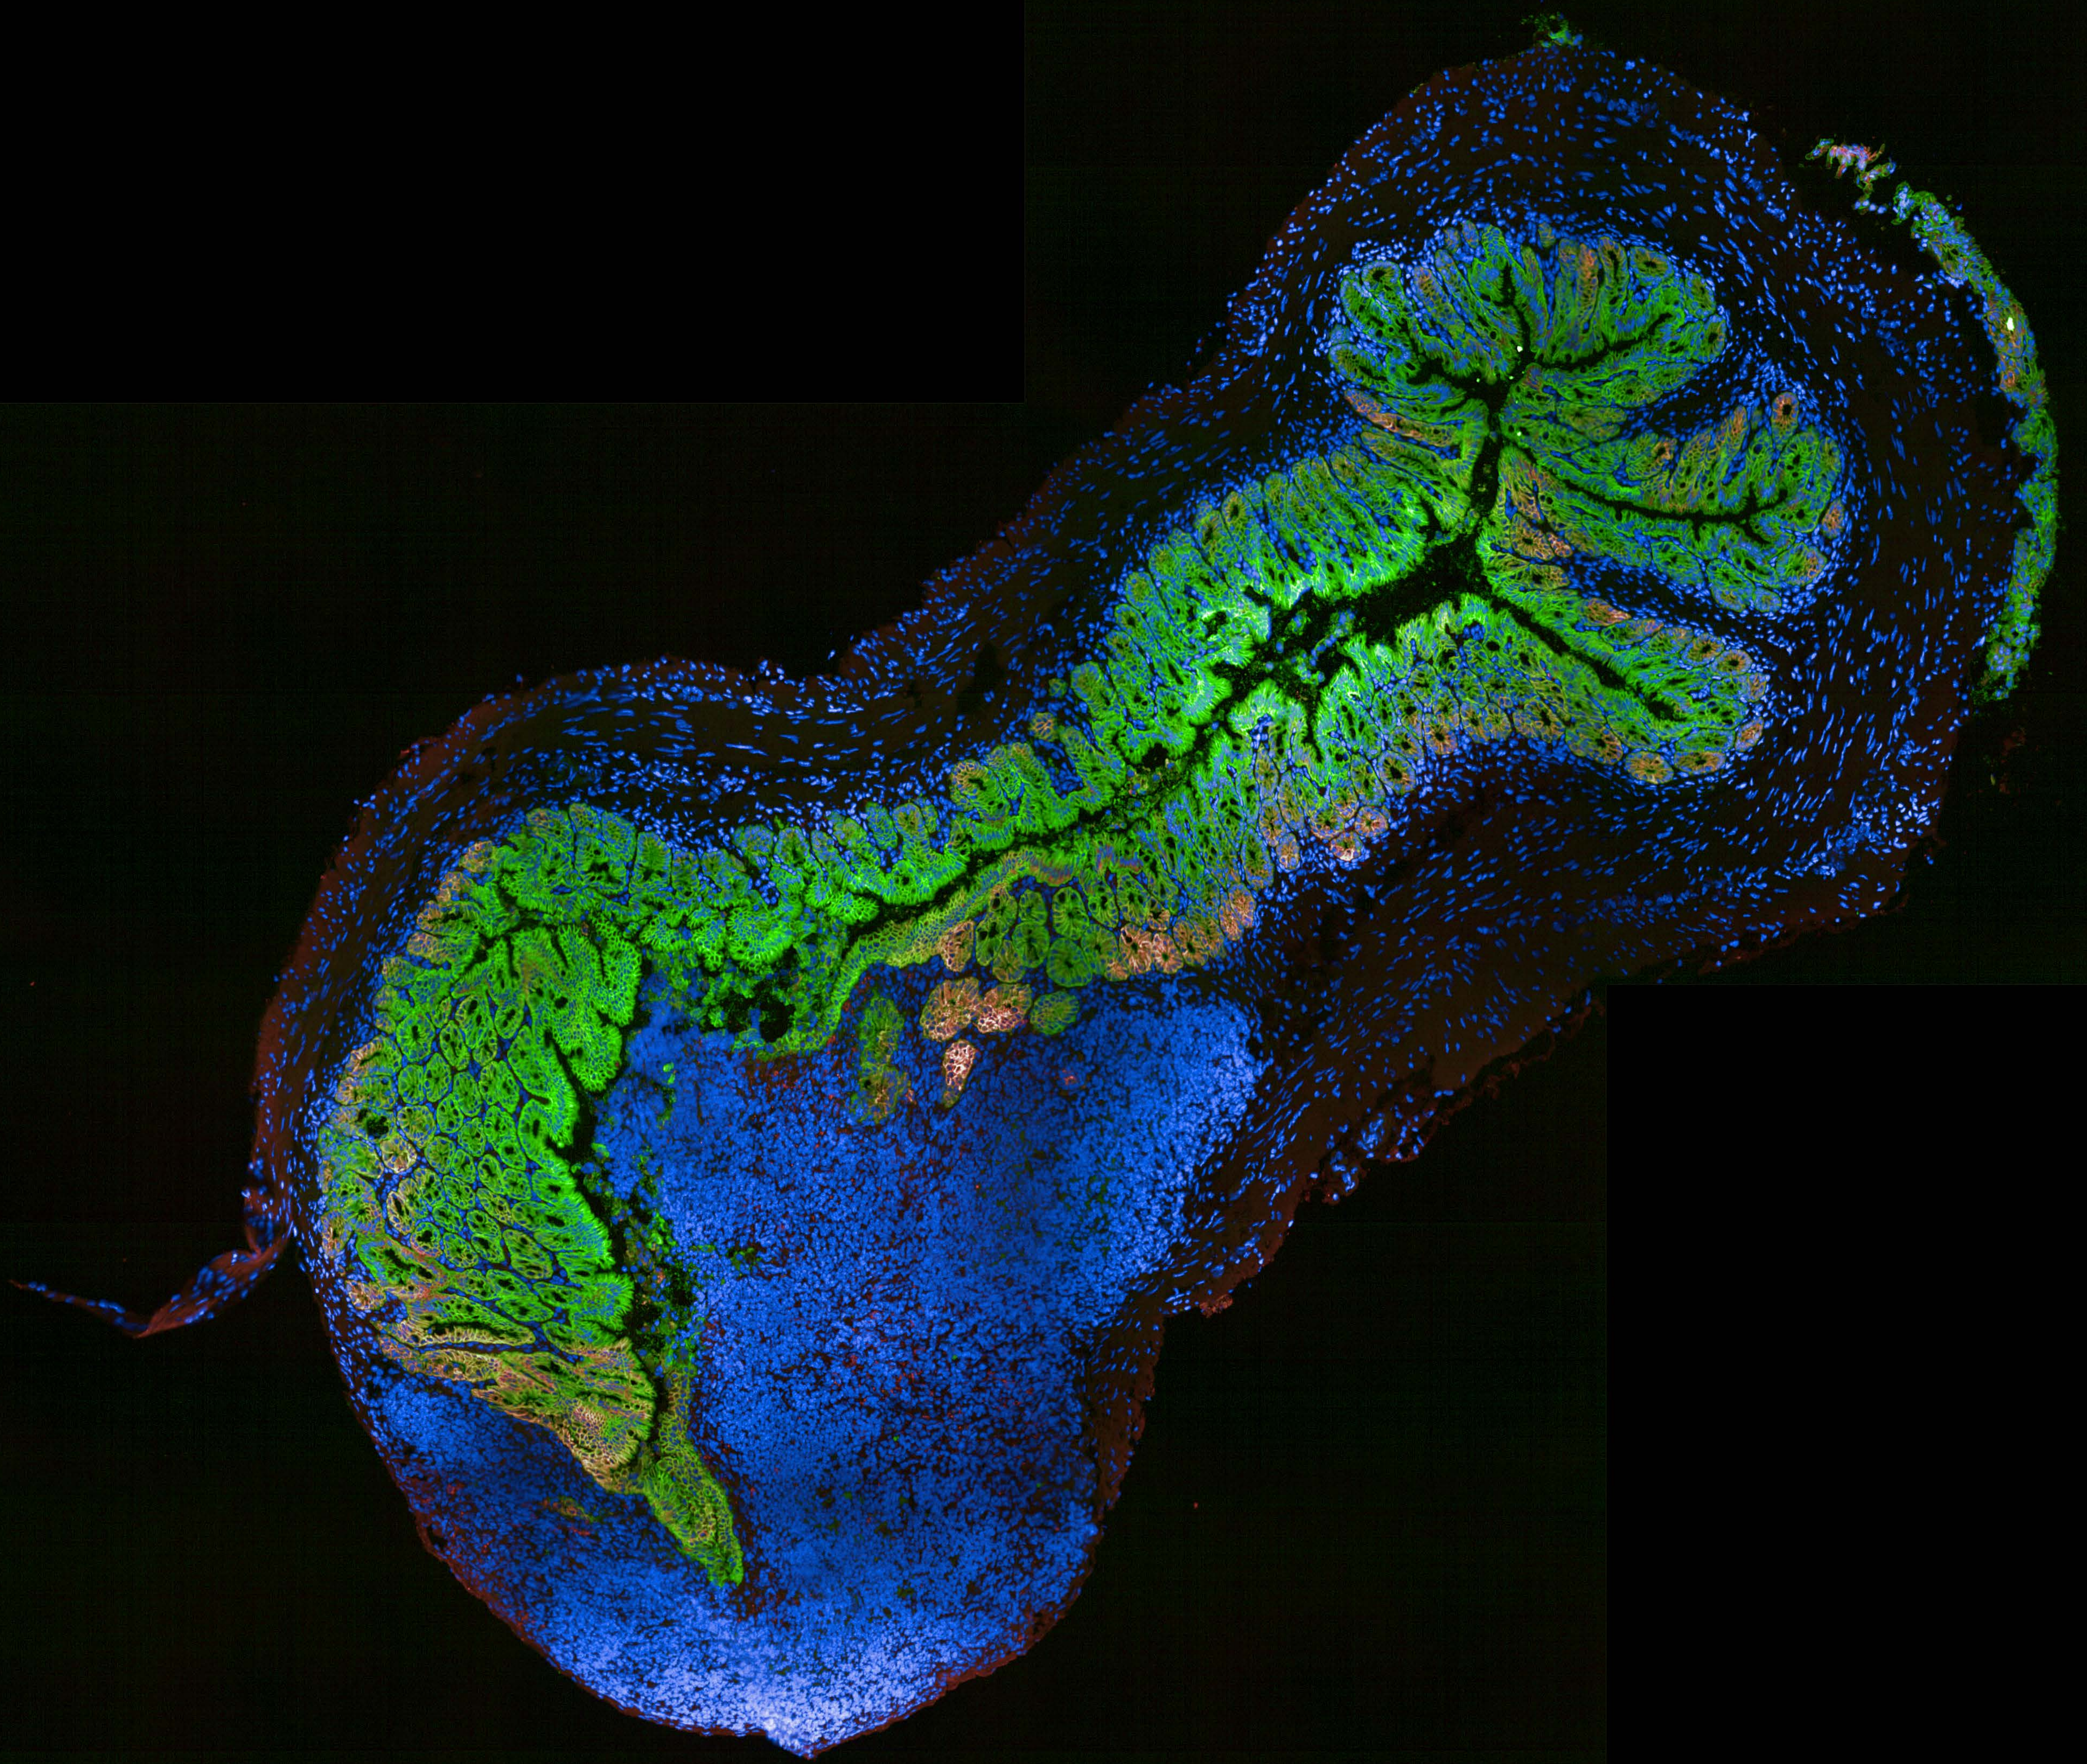

500  $\mu$ m

**Figure S2.** Full color original image of small intestine duodenum section acquired by HCS, red:  $\alpha$ CDH-A647; green anti-EpCAM; blue: DAPI. 24 hours after treatment.

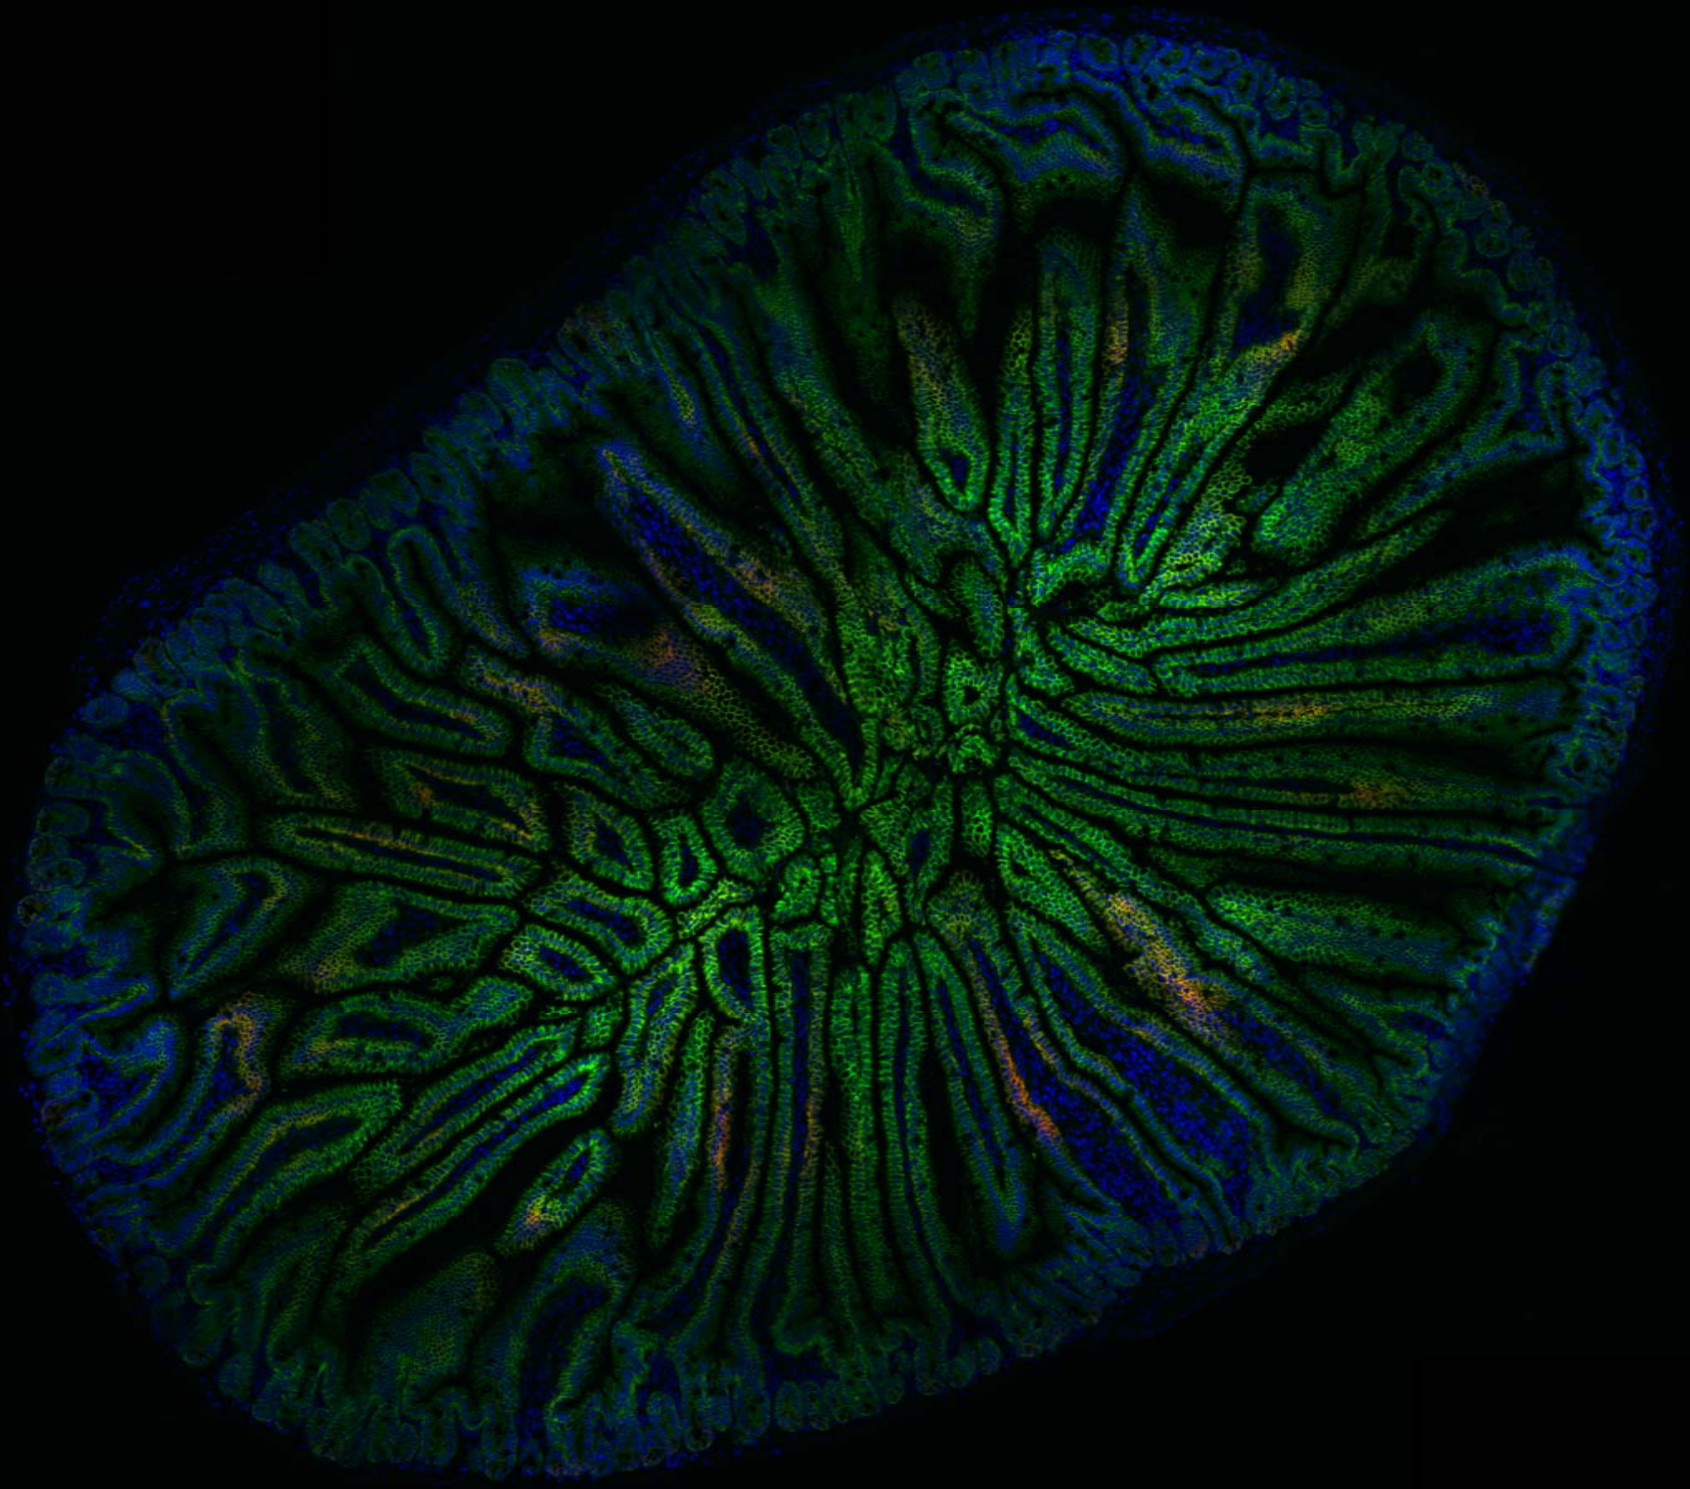

**Figure S3.** Time courses of drug binding to proximal sections of colon and duodenum sections of small intestine determined by total fluorescent intensity of  $\alpha$ CDH-A647. The same tissue sections used in Figure 3d. This quantification method cannot separate non-specific binding from specific binding, which led to wrong interpretation of drug binding time course.

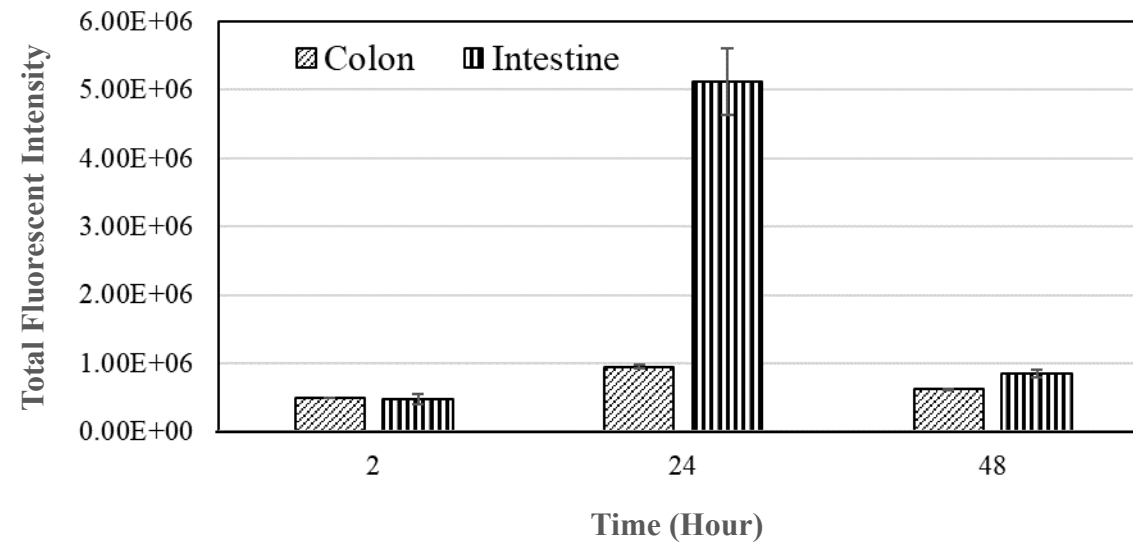

Supplement: 41598_2020_71347_MOESM1_ESM.pdf [file 41598_2020_71347_MOESM1_ESM.pdf]
